# Supplementary material for: Mutanobactin A from the human oral pathogen Streptococcus mutans is a cross-kingdom regulator of the yeast-mycelium transition
Source: Royal Society of Chemistry journal article supplement (doi:10.1039/c0ob00579g), 2010-01-01
Supplement: c0ob00579g.pdf [file c0ob00579g.pdf]

## Electronic Supplementary Information

### **Mutanobactin A from the human oral pathogen *Streptococcus mutans* is a cross-kingdom regulator of the yeast-mycelium transition**

P. Matthew Joyner,<sup>a</sup> Jinman Liu,<sup>b</sup> Zhijun Zhang,<sup>b</sup> Justin Merritt,<sup>b</sup> Fengxia Qi,<sup>b</sup> and Robert H. Cichewicz<sup>\*,a,c</sup>

<sup>a</sup>*Natural Products Discovery Group, Department of Chemistry and Biochemistry, Stephenson Life Sciences Research Center, 101 Stephenson Parkway, University of Oklahoma, Norman, OK 73019 U.S.A.*

<sup>b</sup>*College of Dentistry, 975 NE 10<sup>th</sup> Street, The University of Oklahoma Health Sciences Center, Oklahoma City, OK 73014 U.S.A.*

<sup>c</sup>*Graduate Program in Ecology and Evolutionary Biology, University of Oklahoma, Norman, OK, USA 73019 U.S.A.*

\*To whom correspondence should be addressed. Tel: +1 (405) 325-6969. E-mail:  
rhcichewicz@ou.edu.

## Contents

- **General experimental procedures**
- **Preparation and extraction of bacterial culture**
- **Mutanobactin A (1) chemical and physical data**
- **Table S1  $^1\text{H}$  and  $^{13}\text{C}$  NMR data for mutanobactin A (1)**
- **Fig. S1 HRESIMS (FT-ICR) data for mutanobactin A (1)**
- **Fig. S2 ESI MS/MS data for mutanobactin A (1)**
- **Fig. S3  $^1\text{H}$  NMR spectrum for mutanobactin A (1)**
- **Fig. S4  $^{13}\text{C}$  NMR spectrum for mutanobactin A (1)**
- **Fig. S5  $^1\text{H}$ - $^1\text{H}$  COSY NMR spectrum for mutanobactin A (1)**
- **Fig. S6  $^1\text{H}$ - $^{13}\text{C}$  HSQC NMR spectrum for mutanobactin A (1)**
- **Fig. S7  $^1\text{H}$ - $^{13}\text{C}$  HMBC NMR spectrum for mutanobactin A (1)**
- **Fig. S8  $^1\text{H}$ - $^1\text{H}$  NOESY NMR spectrum for mutanobactin A (1)**
- **Fig. S9  $^1\text{H}$ - $^{15}\text{N}$  HMBC NMR spectrum for mutanobactin A (1)**
- **Fig. S10 1D  $^1\text{H}$ - $^1\text{H}$  TOCSY NMR spectra for mutanobactin A (1)**

**General Experimental Procedures.** NMR data were obtained on a Varian VNMR spectrometer (500 MHz for  $^1\text{H}$ , 125 MHz for  $^{13}\text{C}$ ) with a triple resonance probe at  $22 \pm 0.5$  °C. Electrospray-ionization mass spectrometry data were collected on an IonSpec (Varian, Inc.) 9.4 T FT-ICR instrument. ESI MS/MS analyses were performed on a LCT premier (Waters Corp.) time-of-flight instrument. Flash chromatography was performed on a Biotage Isolera One using a 100 g  $\text{C}_{18}$  column with a flow rate of 50 mL/min. HPLC separations were carried out on a Shimadzu system using a SCL-10A VP controller and Gemini  $5\mu\text{m}$   $\text{C}_{18}$  column (110Å, 250 x 21.2 mm) with a flow rate of 10 mL/min. All solvents were of ACS grade or better. Optical rotation measurements were performed on a Rudolph Research Autopol III automatic polarimeter;  $[\alpha]_{\text{D}}$  values are given in  $\text{deg}\cdot\text{cm}^2\cdot\text{g}^{-1}$ .

**Preparation and extraction of bacterial culture.** A culture of *Streptococcus mutans* UA159 was prepared by inoculating 15 L of brain-heart infusion (BHI) broth with 100 mL of a stationary phase *S. mutans* UA159 culture. The culture was incubated under microaerobic conditions at 37 °C for 36 h. The culture was extracted three times with equal volumes of ethyl acetate, which was then evaporated *in vacuo* to generate the *S. mutans* UA159 extract.

**Mutanobactin A (1):** white solid;  $[\alpha]_{\text{D}}^{25} = -8.0$  (*c* 0.001 in MeOH);  $\lambda_{\text{max}}$  (MeOH) 221 nm ( $\epsilon/\text{dm}^3 \text{mol}^{-1} \text{cm}^{-1}$  38 900);  $^1\text{H}$ ,  $^{13}\text{C}$ , and  $^{15}\text{N}$  NMR data, see Table S1; HRESIMS (FT-ICR)  $m/z$   $[\text{M-H}]^-$  719.41713 (calcd. for  $\text{C}_{36}\text{H}_{59}\text{N}_6\text{O}_7\text{S}$ , 719.41714).

**Table S1** NMR Spectroscopic Data (DMSO-*d*<sub>6</sub>, 500 MHz for <sup>1</sup>H, 125 MHz for <sup>13</sup>C) for mutanobactin A (**1**)

| position | $\delta_{\text{C}}$ , mult. <sup>a</sup> | $\delta_{\text{H}}$ (J in Hz) | $\delta_{\text{N}}^b$ |
|----------|------------------------------------------|-------------------------------|-----------------------|
| 1        | 50.4, CH                                 | 4.43, ddd (3.7, 9.0, 11.0)    |                       |
| 2a       | 40.4, CH <sub>2</sub>                    | 1.44, m                       |                       |
| 2b       |                                          | 1.81, ddd (3.9, 10.5, 13.8)   |                       |
| 3        | 24.2, CH                                 | 1.59, m                       |                       |
| 4        | 20.9, CH <sub>3</sub>                    | 0.82, d (6.6)                 |                       |
| 5        | 23.5, CH <sub>3</sub>                    | 0.92, d (6.7)                 |                       |
| 6        | 170.5, C                                 |                               |                       |
| 7        | 48.0, CH                                 | 4.52, quintet (6.8)           |                       |
| 8        | 17.7, CH <sub>3</sub>                    | 1.17, d (6.7)                 |                       |
| 9        | 169.7, C                                 |                               |                       |
| 10       | 61.0, CH                                 | 4.12, dd (3.7, 8.9)           |                       |
| 11a      | 29.6, CH <sub>2</sub>                    | 1.72, m                       |                       |
| 11b      |                                          | 2.13, m                       |                       |
| 12       | 24.5, CH <sub>2</sub>                    | 1.90, m                       |                       |
| 13a      | 46.8, CH <sub>2</sub>                    | 3.43, m                       |                       |
| 13b      |                                          | 3.65, ddd (4.5, 7.5, 9.8)     |                       |
| 14       | 171.6, C                                 |                               |                       |
| 15       | 58.8, CH                                 | 3.57, dd (8.3, 10.0)          |                       |
| 16       | 26.2, CH                                 | 2.33, m                       |                       |
| 17       | 20.4, CH <sub>3</sub>                    | 0.84, d (6.6)                 |                       |
| 18       | 18.8, CH <sub>3</sub>                    | 0.77, d (6.8)                 |                       |
| 19       | 168.8, C                                 |                               |                       |
| 20       | 52.2, CH                                 | 4.87 ddd (2.6, 8.0, 9.0)      |                       |
| 21a      | 28.5, CH <sub>2</sub>                    | 2.23, dd (2.6, 16.0)          |                       |
| 21b      |                                          | 3.19, dd (9.0, 16.0)          |                       |
| 22       | 170.4, C                                 |                               |                       |
| 23a      | 43.7, CH <sub>2</sub>                    | 2.79, m                       |                       |
| 23b      |                                          | 3.28, m                       |                       |
| 24       | 41.0, CH                                 | 3.25, m                       |                       |
| 25       | 61.7, CH                                 | 3.87, d (9.8)                 |                       |
| 26       | 167.7, C                                 |                               |                       |
| 27       | 203.8, C                                 |                               |                       |
| 28a      | 41.4, CH <sub>2</sub>                    | 2.33, m                       |                       |
| 28b      |                                          | 2.44, dd (6.0, 16.6)          |                       |
| 29       | 23.1, CH <sub>2</sub>                    | 1.44, m                       |                       |
| 30       | 28.7, CH <sub>2</sub>                    | 1.20, m                       |                       |
| 31       | 22.1, CH <sub>2</sub>                    | 1.25, m                       |                       |
| 32       | 28.8, CH <sub>2</sub>                    | 1.23, m                       |                       |
| 33       | 22.1, CH <sub>2</sub>                    | 1.25, m                       |                       |
| 34       | 31.3, CH <sub>2</sub>                    | 1.23, m                       |                       |
| 35       | 28.9, CH <sub>2</sub>                    | 1.27, m                       |                       |
| 36       | 14.0, CH <sub>3</sub>                    | 0.85, t (6.8)                 |                       |
| C1-NH    |                                          | 8.59, d (9.0)                 | 120.0                 |
| C7-NH    |                                          | 7.77, d (6.5)                 | 112.0                 |
| C10-NH   |                                          |                               | nd <sup>c</sup>       |
| C15-NH   |                                          | 8.05, d (8.5)                 | 107.5                 |
| C20-NH   |                                          | 7.23, d (8.0)                 | 116.0                 |
| C23-NH   |                                          | 7.90, dd (5.3, 9.0)           | 105.5                 |

<sup>a</sup>Determined by HSQC experiment at 500 MHz.

<sup>b</sup>Determined by HMBC experiment at 500 MHz.

<sup>c</sup> nd: not detected

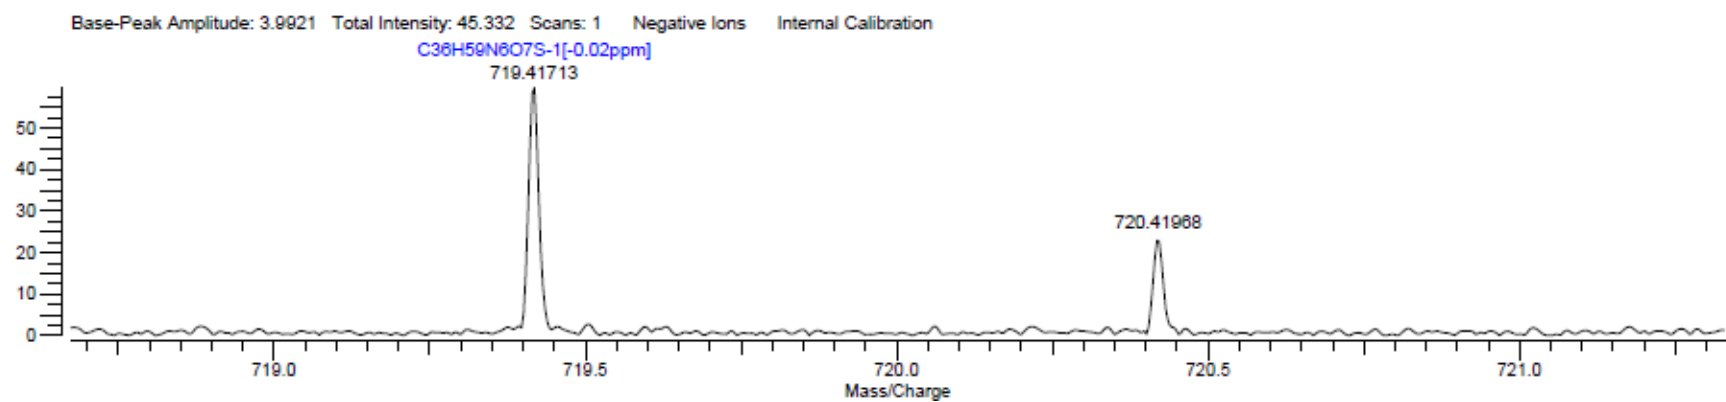

**Fig. S1** HRESIMS (FT-ICR) data for mutanobactin A (**1**)

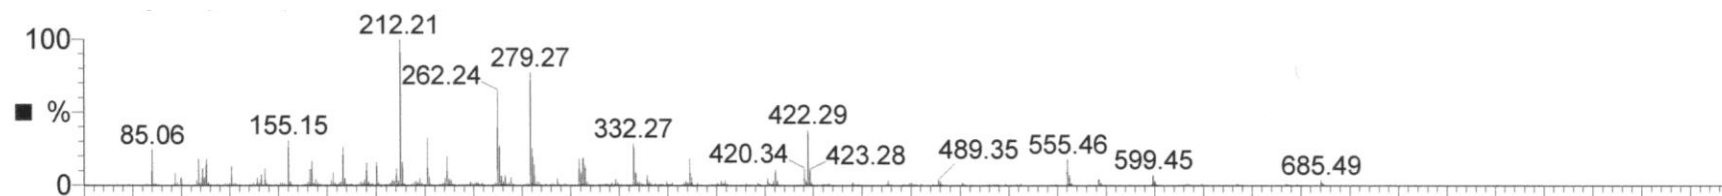

**Fig. S2** ESI MS/MS data for mutanobactin A (1)

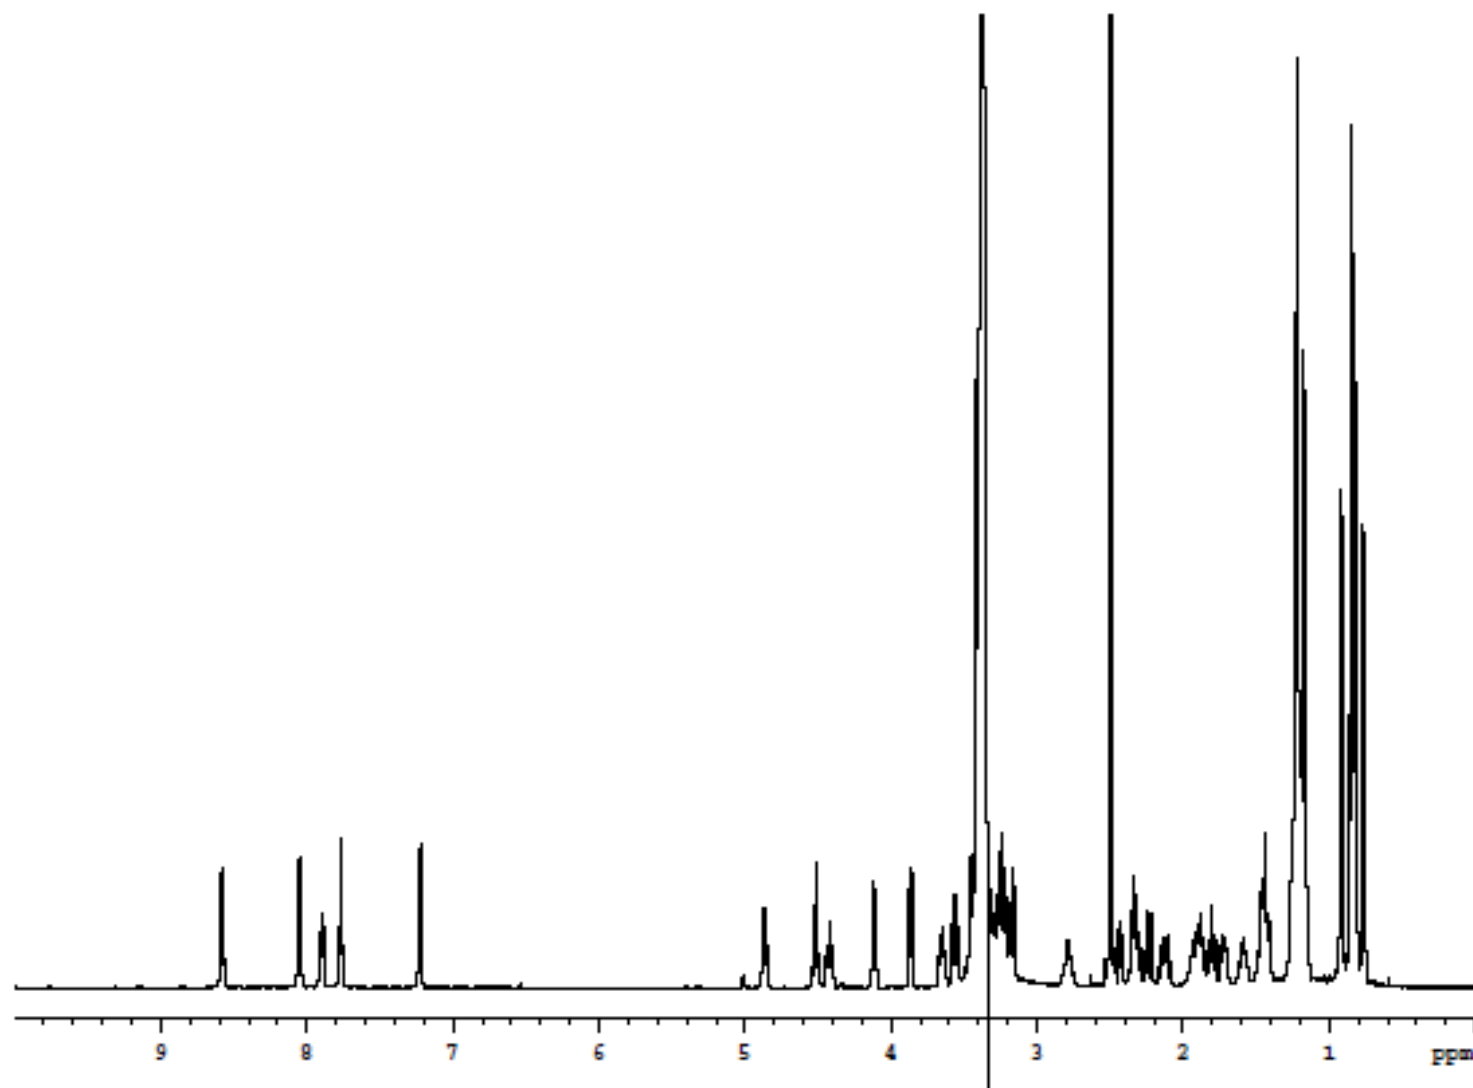

**Fig. S3**  $^1\text{H}$  NMR spectrum for mutanobactin A (1)

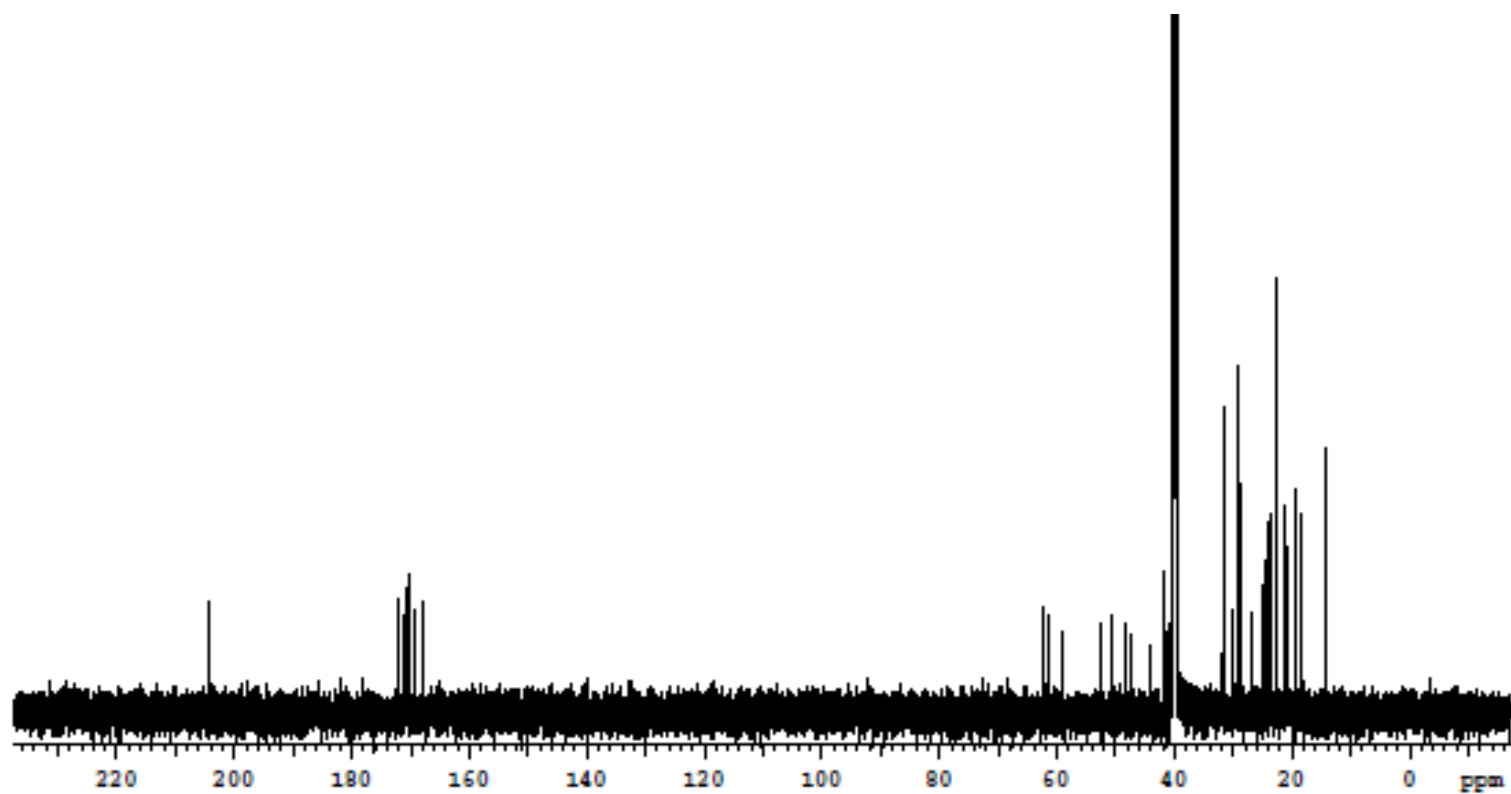

**Fig. S4**  $^{13}\text{C}$  NMR spectrum for mutanobactin A (**1**)



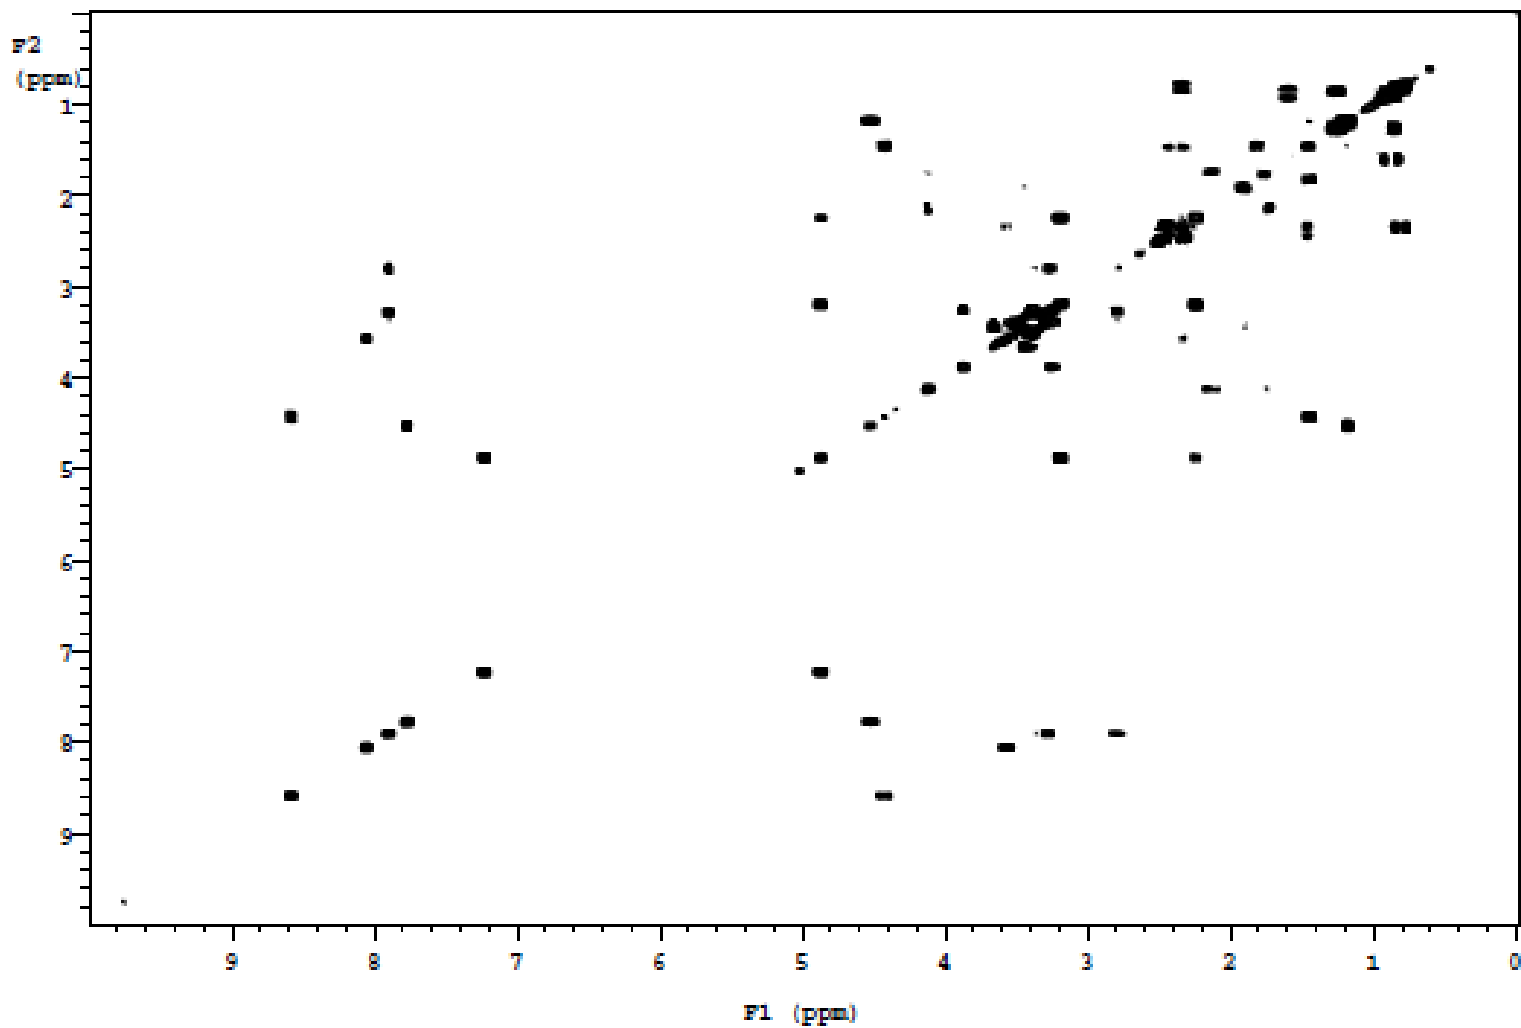

Fig. S5  $^1\text{H}$ - $^1\text{H}$  COSY NMR spectrum for mutanobactin A (1)

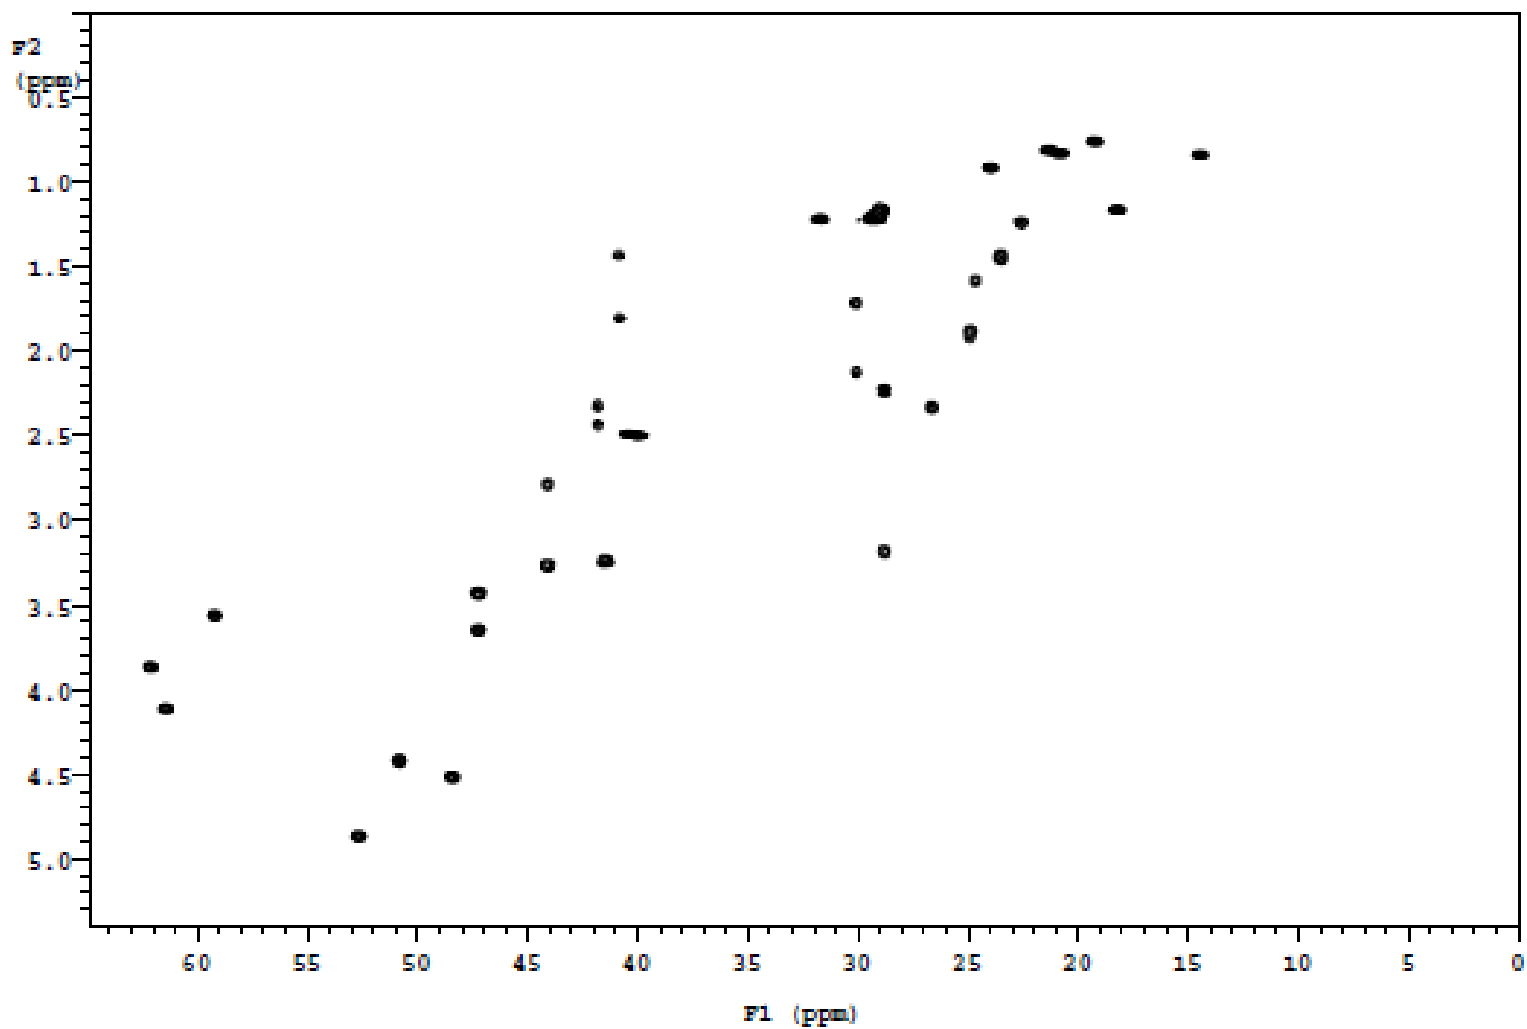

**Fig. S6** <sup>1</sup>H-<sup>13</sup>C HSQC NMR spectrum for mutanobactin A (**1**)

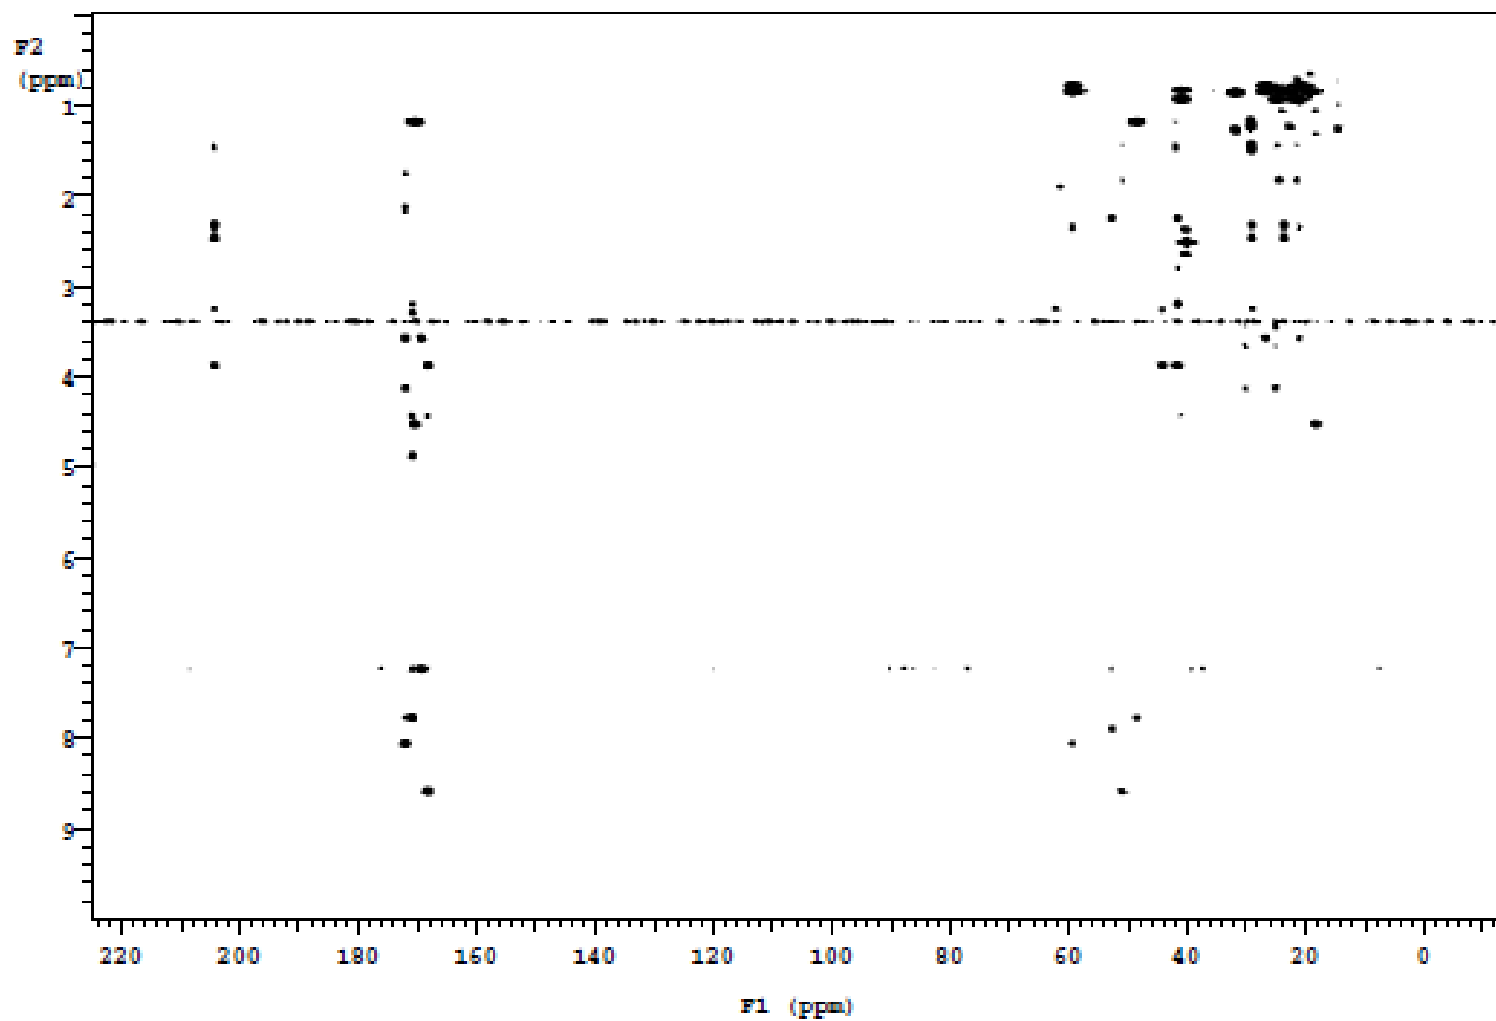

**Fig. S7**  $^1\text{H}$ - $^{13}\text{C}$  HMBC NMR spectrum for mutanobactin A (**1**)

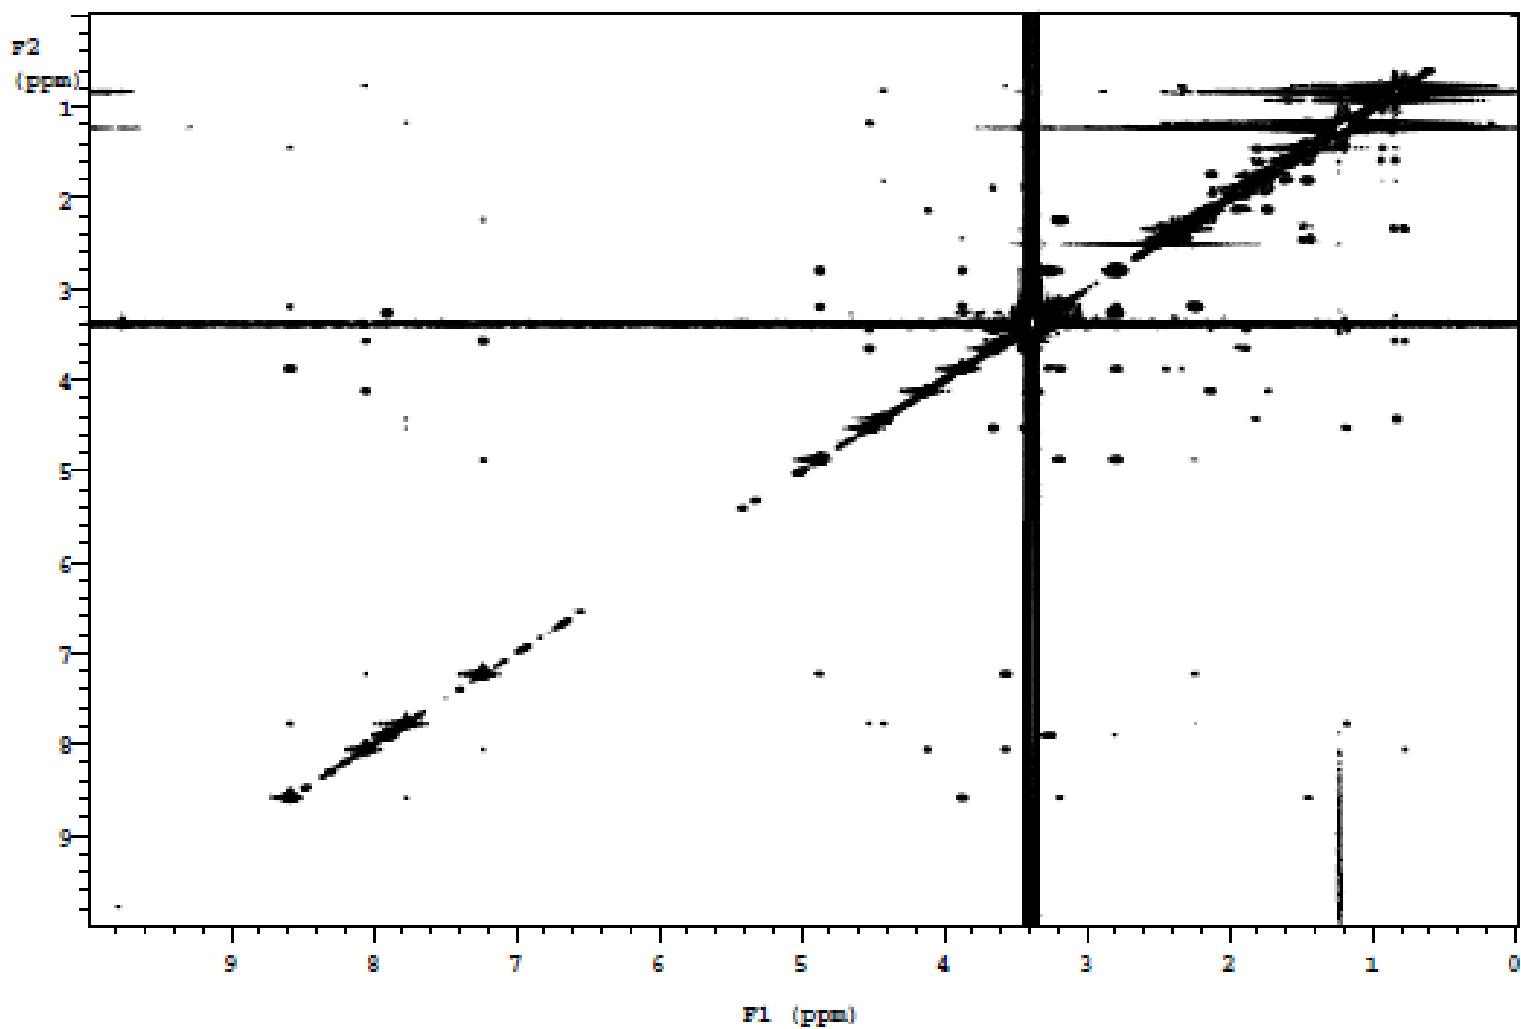

**Fig. S8**  $^1\text{H}$ - $^1\text{H}$  NOESY NMR spectrum for mutanobactin A (**1**)

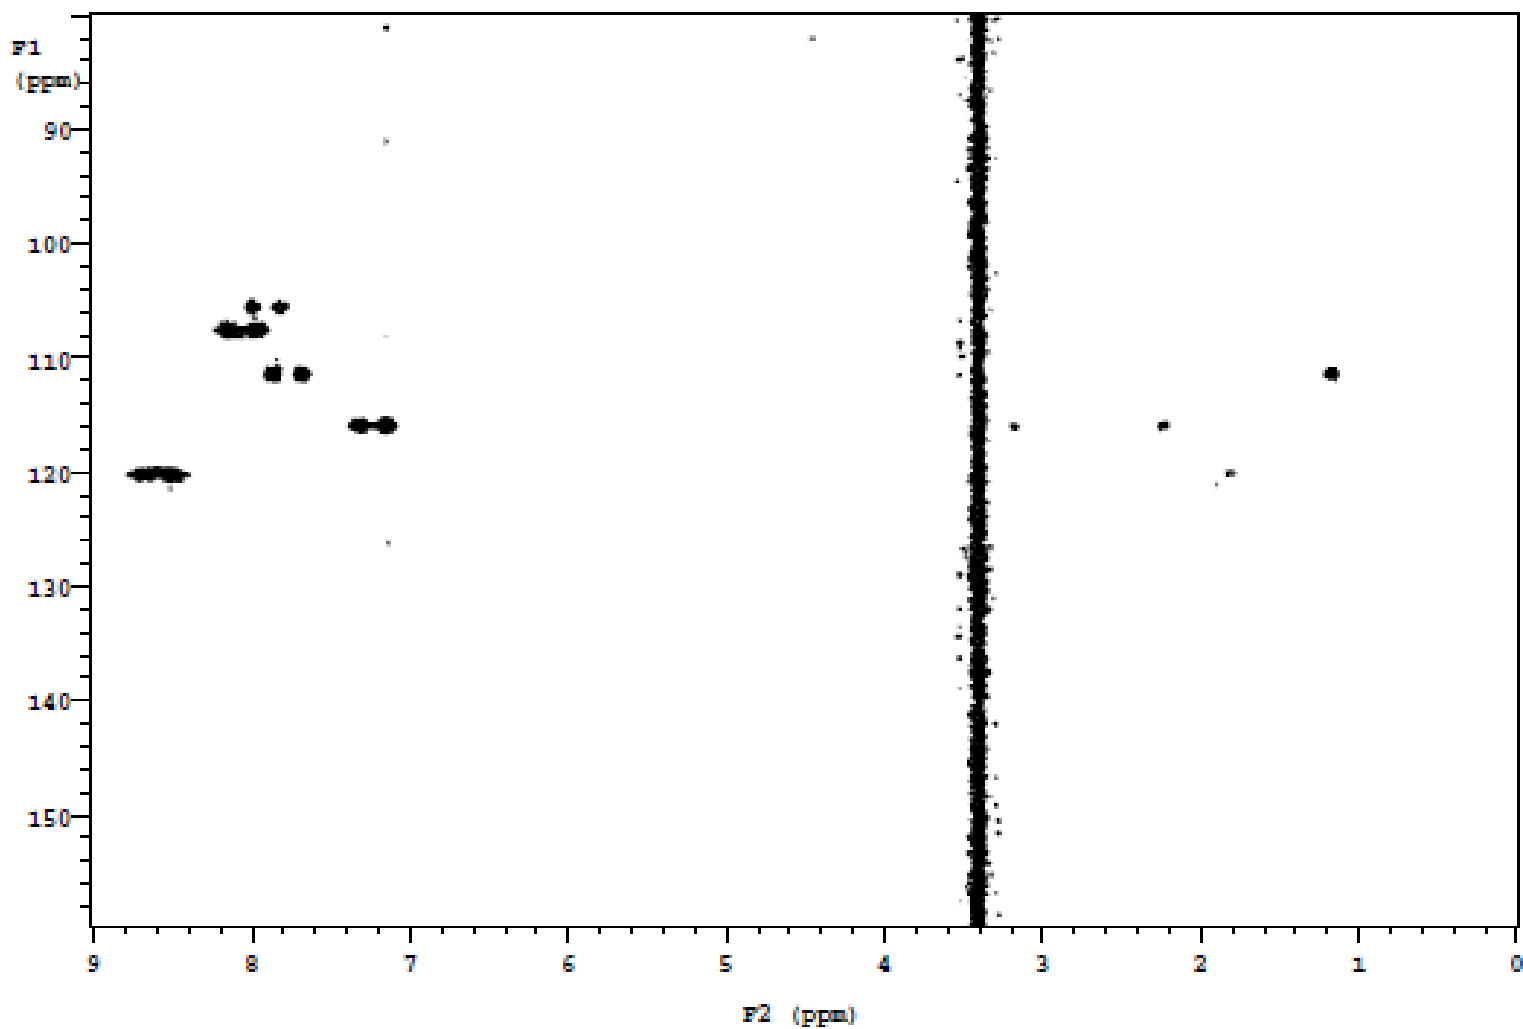

**Fig. S9**  $^1\text{H}$ - $^{15}\text{N}$  HMBC NMR spectrum for mutanobactin A (**1**)





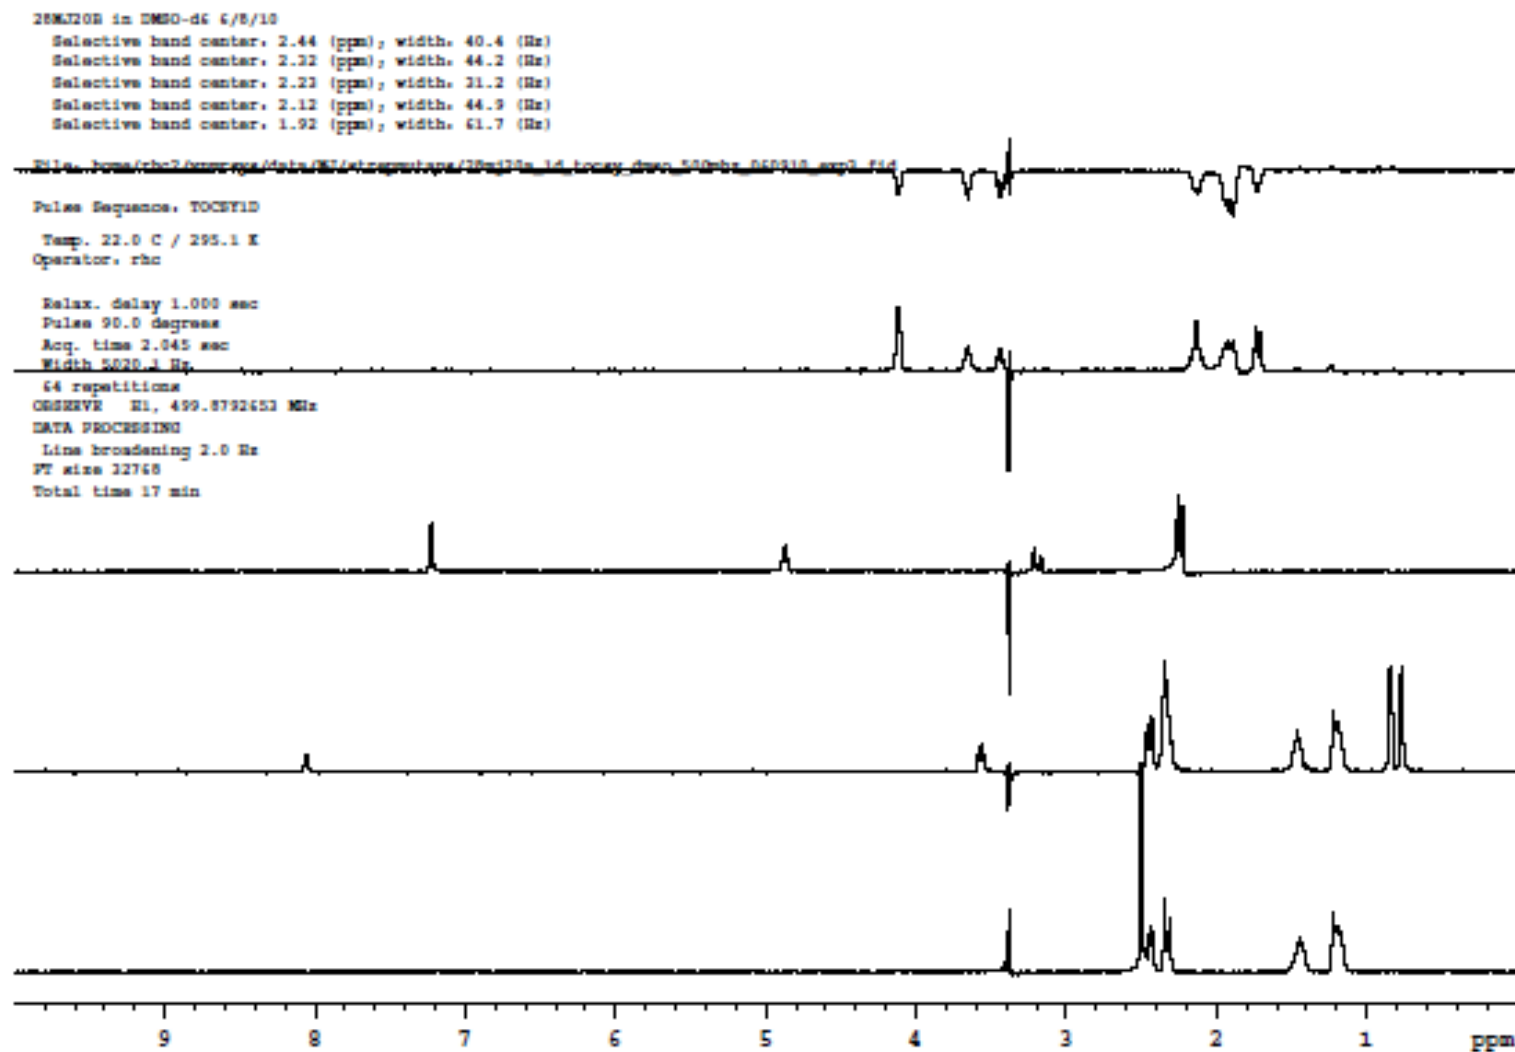

Fig. S10 1D  $^1\text{H}$ - $^1\text{H}$  TOCSY NMR spectra for mutanobactin A (**1**) (panel 3 of 3)
